# Supplementary material for: The association between accelerometer-measured patterns of sedentary time and health risk in children and youth: results from the Canadian Health Measures Survey
Source: BMC Public Health. 2013 Mar 7;13:200. doi: 10.1186/1471-2458-13-200 (PMC3599834; doi:10.1186/1471-2458-13-200)
Supplement: Additional file 1: Table S1 — Associations between sedentary time variables and body mass index, presented by sex and age groups. [file 1471-2458-13-200-S1.xls]

## Sheet: Sheet1
Additional File 1 (Table S1): Associations (regression co-efficients, ß) between sedentary time variables and body mass index, presented by sex and age groups.
	Boys			Girls
	6 to 10	11 to 14	15 to 19	6 to 10	11 to 14	15 to 19
Total sedentary time
All	-0.196006	0.712626	-0.42126	-0.290914	-1.00936	-0.780721
Number of breaks	-0.233348	-0.735556	-0.704076	-0.543556	0.149653	-0.131928
20 minute bouts	-0.037741	0.537482	-0.24798	-0.135537	-0.705314	-0.295515
40 minute bouts	-0.0740475	0.516596	-0.202048	-0.140173	-0.481022	-0.229338
60 minute bouts	-0.0373894	0.39391	-0.090175	-0.0502201	-0.497944	-0.267967
80 minute bouts	-0.0645695	0.493086	-0.0455557	-0.0625993	-0.433369	-0.167432
100 minute bouts	0.0190328	0.421153	-0.223843	-0.0225057	-0.288265	-0.066842
120 minute bouts	0.0299577	0.55065	-0.31659	0.0783859	-0.245096	0.00730326
Weekdays after 3pm
All	-0.459646	1.43847	-0.351448	-0.344398	-1.30148	-0.94834
Number of breaks	-0.813272	-1.42135	-1.20558	-0.845911	0.485393	0.089665
20 minute bouts	-0.154881	0.906427	-0.0413845	-0.123952	-0.971037	-0.391703
40 minute bouts	-0.0396967	0.813619	-0.128808	-0.128776	-0.764486	-0.458063
60 minute bouts	0.0797924	0.628437	-0.162628	0.145186	-0.509818	-0.565611
80 minute bouts	0.00675958	0.72*	0.287974	0.12026	-0.730135	-0.598485
100 minute bouts	0.132182	0.604935	0.284333	0.0278221	-0.449667	-0.252542
120 minute bouts	0.0869658	0.628928	-0.254746	0.215819	-0.21247	-0.209904
Week-ends
All	-0.176612	0.570252	-0.488784	-0.330448	-0.833381	-0.234403
Number of breaks	0.017337	-0.281221	-0.532055	-0.18415	0.0256189	-0.460466
20 minute bouts	-0.117136	0.396462	-0.301743	-0.184397	-0.459232	-0.00718696
40 minute bouts	-0.109164	0.328296	-0.209035	-0.118083	-0.238469	0.100303
60 minute bouts	-0.0849435	0.291503	-0.160582	-0.115137	-0.320366	0.00948397
80 minute bouts	-0.0926241	0.33819	-0.225032	-0.0718383	-0.238114	0.111598
100 minute bouts	-0.0472505	0.266678	-0.316456	-0.0348617	-0.312042	0.12798
120 minute bouts	-0.0219674	0.344072	-0.30567	-0.019575	-0.282848	0.190011
Note: All regressions were adjusted for age, MVPA and accelerometer wear time.
Note: Beta co-efficients represent the change in BMI for every increase in sedentary behavior
of 60 minutes except for breaks where the betas represent change in BMI for every increase
of 10 breaks in sedentary behaviour.
Note: Significance set at p < .006 to account for multiple comparisons within each time period
BMI, body mass index
MVPA, moderate-to-vigorous physical activity
ß, beta co-efficient of the regression
* Significant association
