# Supplementary material for: The association between accelerometer-measured patterns of sedentary time and health risk in children and youth: results from the Canadian Health Measures Survey
Source: BMC Public Health. 2013 Mar 7;13:200. doi: 10.1186/1471-2458-13-200 (PMC3599834; doi:10.1186/1471-2458-13-200)
Supplement: Additional file 5: Table S5 — Associations between sedentary time variables and non-HDL cholesterol, presented by sex and age groups. [file 1471-2458-13-200-S5.xls]

## Sheet: Sheet1
Additional File 5 (Table S5): Associations (regression coefficients, ß) between sedentary time variables and non-HDL cholesterol, presented by sex and age groups.
	Boys			Girls
	6 to 10	11 to 14	15 to 19	6 to 10	11 to 14	15 to 19
Total sedentary time
All	-0.0365267	0.00369505	-0.00550496	-0.0669003	-0.1818	-0.209058
Number of breaks	-0.025545	-0.00913549	-0.0562332	-0.0379183	0.071244	0.0459911
20 minute bouts	-0.0183662	0.00928557	0.0262993	-0.0374255	-0.117349	-0.0879804
40 minute bouts	-0.0116056	-0.0206892	0.0437626	-0.04151	-0.0963782	-0.0494369
60 minute bouts	-0.0034479	-0.00348362	0.072888	-0.0261948	-0.0839895	-0.0609393
80 minute bouts	0.0152798	-0.0214691	0.0562536	-0.0437192	-0.0572097	-0.0216524
100 minute bouts	0.0206083	-0.0441331	0.0393576	-0.0215348	-0.0326232	0.0239538
120 minute bouts	0.0455562	-0.0300233	0.0367029	-0.0264528	-0.0493515	0.0368802
Weekdays after 3pm
All	-0.0161782	-0.011875	0.133851	-0.101121	-0.221594	-0.215565
Number of breaks	-0.0507857	-0.0523472	-0.183613	-0.0677237	0.0759038	-0.00176471
20 minute bouts	0.00909229	0.00271968	0.148321	-0.0491088	-0.150989	-0.0716136
40 minute bouts	0.00691521	-0.0132289	0.135934	-0.0472935	-0.0697748	-0.0181417
60 minute bouts	0.044621	-0.0038589	0.122514	-0.0230529	-0.0438821	-0.0128727
80 minute bouts	0.0747375	0.000440891	0.160912	-0.061463	-0.0166204	-0.0132459
100 minute bouts	0.0853586	-0.0324818	0.140202	-0.0732128	-0.02724	0.0577972
120 minute bouts	0.102003	-0.0214717	0.129991	-0.0434511	-0.0402431	0.0635384
Week-ends
All	-0.00926938	0.017915	-0.124	-0.0096284	-0.131113	-0.111503
Number of breaks	-0.035303	0.010921	-0.0108206	-0.0176467	-0.0011401	0.0323513
20 minute bouts	0.00435551	0.01464	-0.0758147	0.00573353	-0.0888322	-0.073883
40 minute bouts	0.00473654	-0.00636267	-0.0383062	0.00769351	-0.068426	-0.0660832
60 minute bouts	0.00525008	0.00188858	-0.0145384	0.0136472	-0.0563256	-0.0595347
80 minute bouts	0.0092356	-0.0108246	-0.0385985	-0.000420899	-0.0641133	-0.0344989
100 minute bouts	0.00777329	-0.0116819	-0.0379694	0.0208952	-0.0526668	-0.0255342
120 minute bouts	0.0122407	-0.0256833	-0.050476	0.0224188	-0.0669606	-0.00623071
Note: All regressions were adjusted for age, MVPA and accelerometer wear time.
Note: Beta co-efficients represent the change in BMI for every increase in sedentary behavior
of 60 minutes except for breaks where the betas represent change in BMI for every increase
of 10 breaks in sedentary behaviour.
Note: Significance set at p < .006 to account for multiple comparisons within each time period
BMI, body mass index
MVPA, moderate-to-vigorous physical activity
ß, beta co-efficient of the regression
* Significant association
